# Supplementary material
Source: PubMed Central journal article supplement (PMC2576657)

## Chicory leaves $10^6$ bacteria

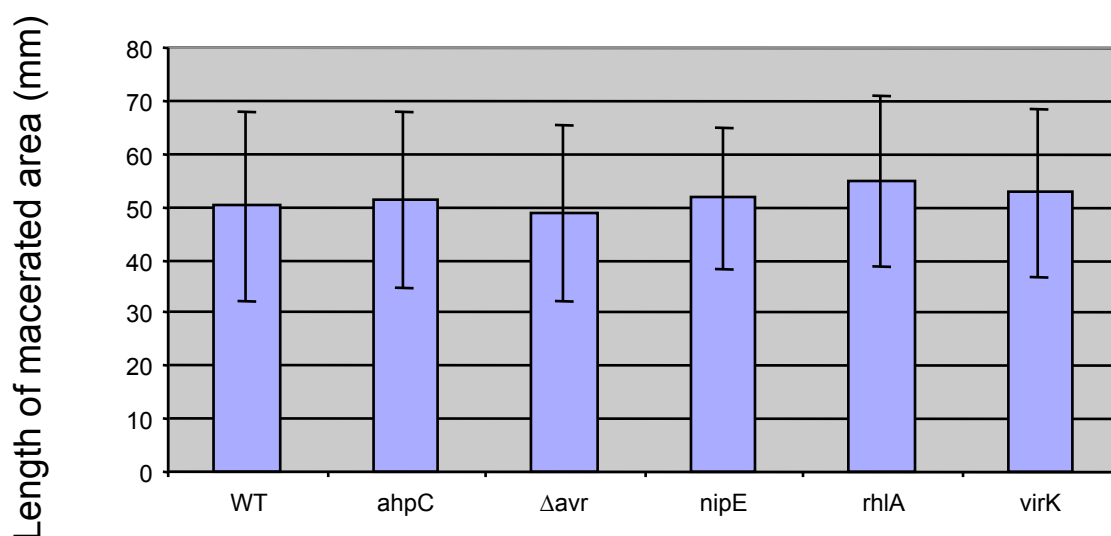

Virulence of the ahpC, Δavr, nipE, rhIA and virK mutants on chicory leaves.

After infection with  $10^6$  bacteria, the chicory leaves were incubated for 24 hours at 30°C and the length of rotted tissue was measured to estimate the disease severity. The mean value and the standard deviations reported correspond to thirty leaves inoculated with each strain.

# Saintpaulia 10<sup>6</sup> bacteria

## Class of symptoms

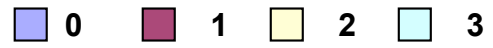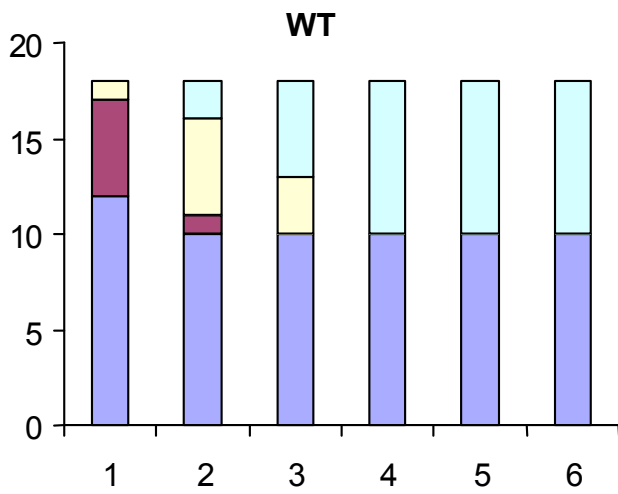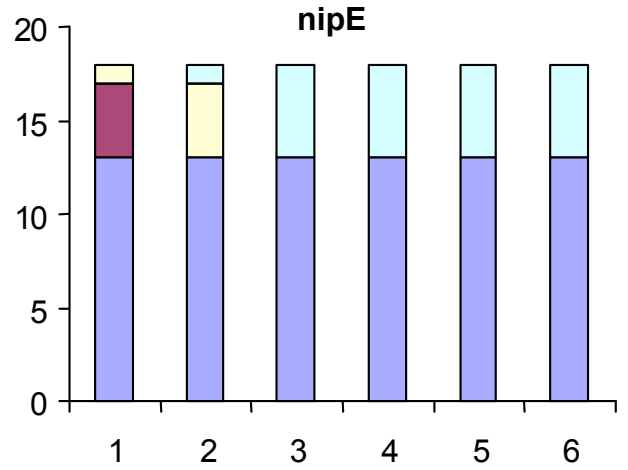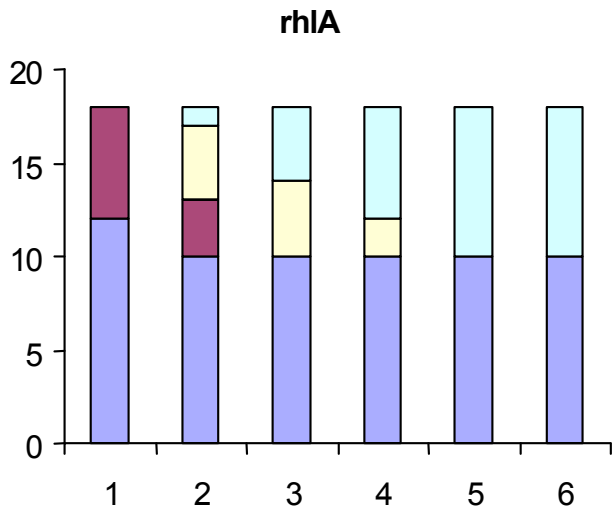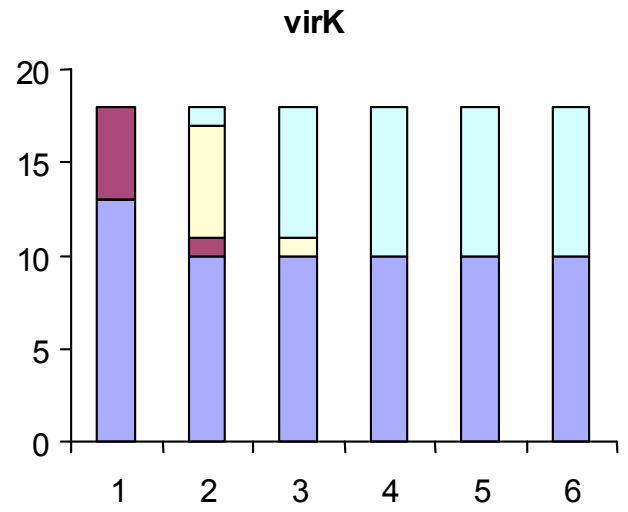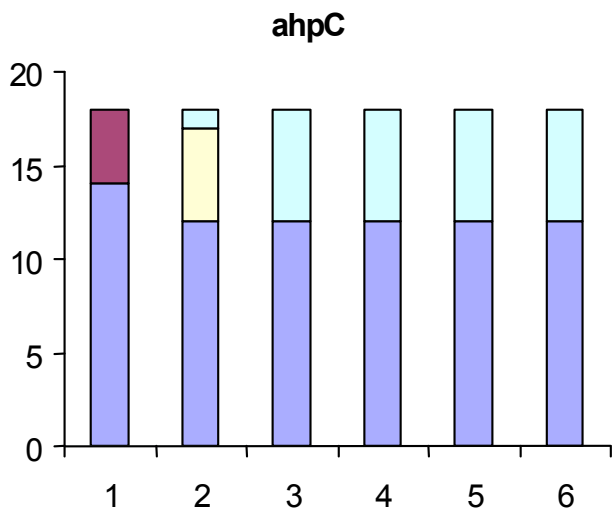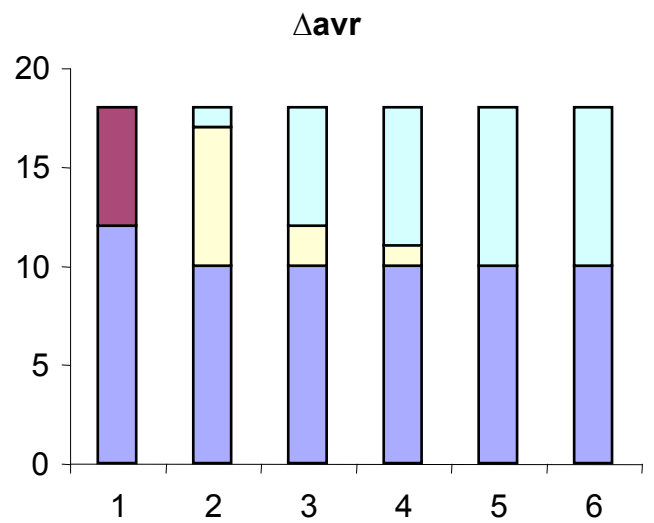

# Saintpaulia 10<sup>7</sup> bacteria

Class of symptoms

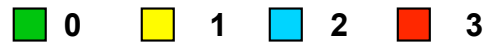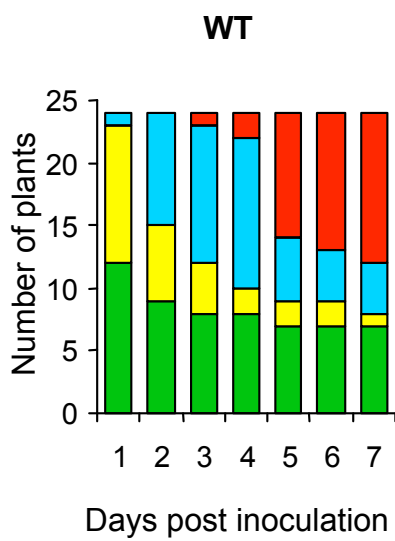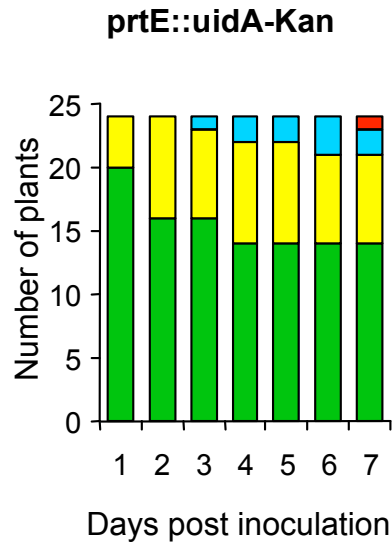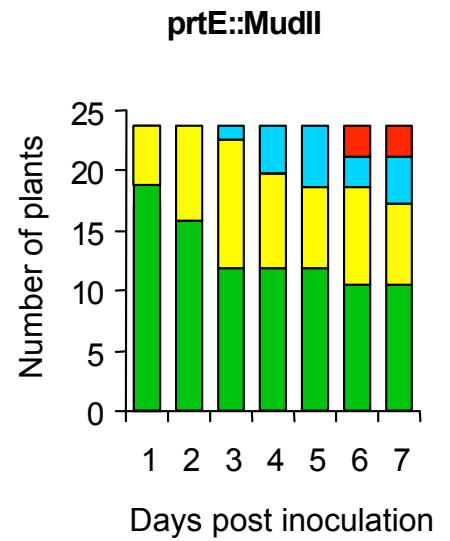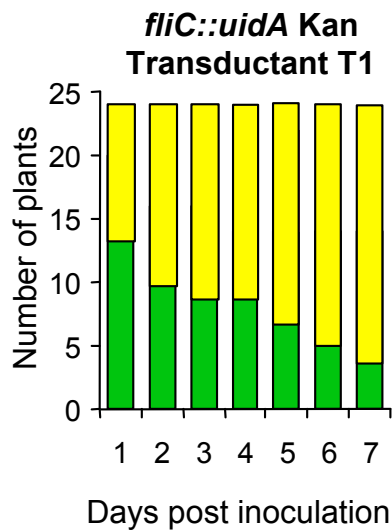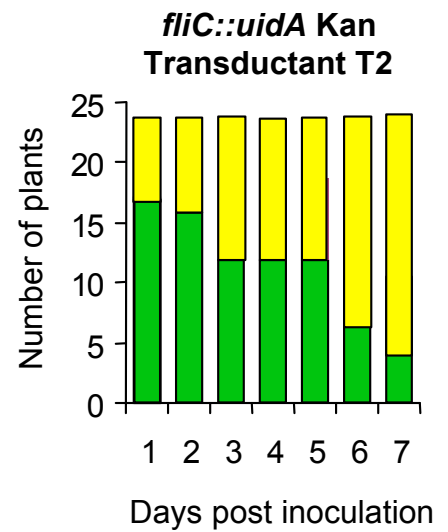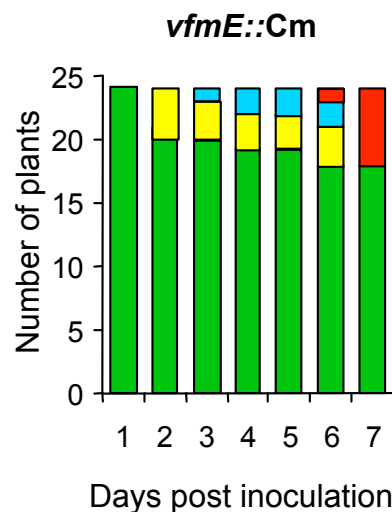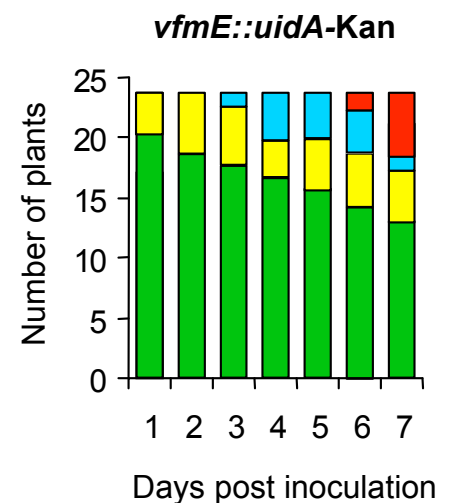

Supplement: supp_190_22_7508__1.pdf [file supp_190_22_7508__1.pdf]
